# Supplementary material for: Early menarche and childbirth accelerate aging-related outcomes and age-related diseases: Evidence for antagonistic pleiotropy in humans
Source: eLife. 2025 Aug 12;13:RP102447. doi: 10.7554/eLife.102447 (PMC12342826; doi:10.7554/eLife.102447)
Supplement: Supplementary file 1. [file elife-102447-supp1.xlsx]

## Sheet: Supplementary File 1
Supplementary File 1. Overview of GWAS data used for MR analysis
Phenotype	Unit	Sample size	Number of cases	Number of SNPs	Author
Exposure
Age at menarche	years	279470	279470	209	Po-Ru Loh , et al
Age at first birth	years	418758	418758	33	Melinda C Mills, et al
Mediator
BMI	kg/m2	461460	461460	411	Ben Elsworth
Outcome
General aging
Frailty index	-	175226	175226		Janice L Atkins, et al
Father's age at death	years	317652	317652		Luke C Pilling, et al
Mother's age at death	years	246941	246941		Luke C Pilling, et al
DNA methylation GrimAge acceleration	-	6148	6148		Daniel L McCartney , et al
Organ aging/Disease
Age at menopause onset	years	156364	156364		Po-Ru Loh , et al
LOAD	yes or no	94437	35274		Brian W Kunkle, et al
Osteoporosis	yes or no	484598	7751		Handan M Dönertaş, et al
Type 2 diabetes	yes or no	490089	38841		Saori Sakaue, et al
CHF	yes or no	486160	14262		Saori Sakaue, et al
Essential hypertension	yes or no	463010	54358		Ben Elsworth
Facial ageing	categorical ordered, SD	423999	423999		Ben Elsworth
Eye age	years	45444	45444		Sara Ahadi, et al
Cirrhosis	yes or no	218792	1931		-
CKD	yes or no	20920	1533		Genevieve L Wojcik, et al
Early onset COPD	yes or no	215705	3508		-
Gastrointestinal or abdominal disease	yes or no	484598	77978		Handan Melike Dönertaş, et al
Organ cancer
Breast cancer	yes or no	257730	17389		Saori Sakaue, et al
Ovarian cancer	yes or no	246520	1588		Saori Sakaue, et al
Endometrial cancer	yes or no	121885	12906		Tracy A O'Mara , et al
Cervical cancer	yes or no	462933	1889		Ben Elsworth
GWAS	genome-wide association study
MR	Mendelian randomization
BMI	body mass index
LOAD	late-onset Alzheimer's disease
CHF	chronic heart failure
CKD	chronic kidney disease
COPD	chronic obstructive pulmonary disease
