# Supplementary material for: Early menarche and childbirth accelerate aging-related outcomes and age-related diseases: Evidence for antagonistic pleiotropy in humans
Source: eLife. 2025 Aug 12;13:RP102447. doi: 10.7554/eLife.102447 (PMC12342826; doi:10.7554/eLife.102447)
Supplement: Supplementary file 2. [file elife-102447-supp2.xlsx]

## Sheet: Supplementary File 2
Supplementary File 2. SNPs included for each outcome
Exposure	Outcome	SNP number	F statistics
Age at menarche	Frailty index	209	23.97
	Father's age at death	209	23.97
	Mother's age at death	209	23.97
	GrimAge	209	23.97
	Age at menopause onset	207	23.98
	LOAD	208	24.02
	Osteoporosis	209	23.97
	Type 2 diabetes	202	22.05
	CHF	208	24
	Essential hypertension	201	23.83
	Facial aging	209	23.97
	Eye age	209	23.97
	Cirrhosis	209	23.97
	CKD	209	23.97
	Early onset COPD	209	23.97
	Gastrointestinal or abdominal disease	209	23.97
	Breast cancer	209	23.97
	Ovarian cancer	208	24.01
	Endometrial cancer	209	23.97
	Cervical cancer	209	23.97
	BMI	181	24.05
Age at first birth	Frailty index	33	13.08
	Father's age at death	33	13.08
	Mother's age at death	33	13.08
	GrimAge	33	13.08
	Age at menopause onset	32	13.19
	LOAD	33	13.08
	Osteoporosis	33	13.08
	Type 2 diabetes	33	13.08
	CHF	33	13.08
	Essential hypertension	33	13.08
	Facial aging	33	13.08
	Eye age	33	13.08
	Cirrhosis	33	13.08
	CKD	33	13.08
	Early onset COPD	33	13.08
	Gastrointestinal or abdominal disease	33	13.08
	Breast cancer	33	13.08
	Ovarian cancer	33	13.08
	Endometrial cancer	33	13.08
	Cervical cancer	33	13.08
	BMI	25	13.64
SNP	single nucleotide polymorphisms
LOAD	late-onset Alzheimer's disease
CHF	chronic heart failure
CKD	chronic kidney disease
COPD	chronic obstructive pulmonary disease
BMI	body mass index
