# Supplementary material for: Early menarche and childbirth accelerate aging-related outcomes and age-related diseases: Evidence for antagonistic pleiotropy in humans
Source: eLife. 2025 Aug 12;13:RP102447. doi: 10.7554/eLife.102447 (PMC12342826; doi:10.7554/eLife.102447)
Supplement: Supplementary file 3. [file elife-102447-supp3.xlsx]

## Sheet: Supplementary File 3
Supplementary File 3. Overview results of two-sample MR analysis
Exposure	Outcome	P value (SNPs of confounders excluded)	Beta	Pleiotropy test	Heterogeneity test (IVW)		OR (95% CI)	P value (SNPs of BMI excluded)	Beta	Pleiotropy test	Heterogeneity test (IVW)		OR (95% CI)
					Cochran’s Q	P value				(p value)	Cochran’s Q	P value
Age at menarche	Frailty index	0.00575	-0.0236	0.789	321.67	4.89e-08	0.978 (0.960 – 0.997)	0.0202*	-0.0288	0.634	259.8	1.38e-05	0.972 (0.948 – 0.996)
	Father's age at death	0.000184	0.0227	0.408	256.66	0.00365	1.023 (1.011 – 1.035)	0.0246	0.0147	0.321	221.45	0.00654	1.015 (1.002 – 1.028)
	Mother's age at death	0.000788	0.0197	0.966	220.1	0.146	1.020 (1.008 – 1.032)	0.0387	0.0124	0.46	171.83	0.489	1.012 (1.001 – 1.024)
	GrimAge	0.698
	Age at menopause onset	0.0193418	0.115794	0.73033	354.342	4.33009e-11	1.123 (1.019 – 1.237)	0.0184379	0.115485	0.952675	249.743	4.32539e-05	1.122 (1.020 – 1.236)
	LOAD	0.0388*	-0.108	0.821	252.88	0.00441	0.897 (0.810 – 0.994)	0.0413*	-0.112	0.862	210.27	0.0248	0.894 (0.803 – 0.996)
	Osteoporosis	1.95172e-07	0.00941722	0.27	322.961	3.70822e-11	1.009 (1.006 – 1.013)	1.19499e-07	0.0100698	0.337	351.21	9.05e-40	1.010 (1.006 – 1.014)
	Type 2 diabetes	0.019†	0.123	0.00363	294.49‡	0.000000532‡	1.131 (1.021 – 1.253)	0.00367†	0.148	0.00222	217.27‡	0.00338‡	1.160 (1.051 – 1.280)
	CHF	0.028	-0.0483	0.301	220.61	0.11	0.953 (0.913 – 0.995)	0.11
	Essential hypertension	1.20454e-22	-0.0347163	0.363	521.885	7.87101e-52	0.966 (0.959 – 0.973)	2.53964e-08	-0.0212796	0.33403	443.176	3.68561e-42	0.979 (0.971 – 0.986)
	Facial aging	2.16e-09	-0.0176	0.835	374.62	5.08e-13	0.983 (0.977 – 0.988)	1.97e-05	-0.013	0.78	299.08	6.56e-09	0.987 (0.981 – 0.993)
	Eye age	0.376
	Cirrhosis	0.565
	CKD	0.51
	Early onset COPD	0.00095	-0.177	0.613	220.69	0.139	0.838 (0.755 – 0.931)	0.00342	-0.168	0.994	195.33	0.128	0.846 (0.756 – 0.946)
	Gastrointestinal or abdominal disease	0.771212
	Breast cancer	0.0121†	-0.0152	0.054	252.69‡	0.00452	0.859 (0.764 – 0.966)	0.0153	-0.0598	0.06	215.86	0.013	0.942 (0.898 – 0.989)
	Ovarian cancer	0.549
	Endometrial cancer	0.000902	-0.11	0.323	227.4	0.089	0.896 (0.840 – 0.956)	0.00592	-0.097	0.104	193.2	0.14	0.908 (0.847 – 0.972)
	Cervical cancer	0.104302
Age at first birth	Frailty index	5.93e-11	-0.0648	0.075	27.93	0.468	0.937 (0.919 – 0.961)	3.27e-06	-0.052	0.139	19.03	0.643	0.949 (0.929 – 0.970)
	Father's age at death	6.88e-05	0.0343	0.096	35.22	0.197	1.035 (1.018 – 1.052)	0.000679	0.0319	0.136	26.38	0.283	1.032 (1.014 – 1.052)
	Mother's age at death	0.000178	0.0337	0.083	35.26	0.196	1.034 (1.016 – 1.053)	0.00126	0.033	0.041	28.78	0.188	1.034 (1.013 – 1.054)
	GrimAge	0.0437	-0.806	0.239	40.61	0.058	0.447 (0.204 – 0.977)	0.012	-1.022	0.439	24.14	0.34	0.360 (0.162 – 0.799)
	Age at menopause onset	0.000308	0.267	0.314	50.87	0.00516	1.306 (1.130 – 1.509)	5.15e-05	0.327	0.652	37.54	0.021	1.386 (1.184 – 1.624)
	LOAD	0.336
	Osteoporosis	0.844
	Type 2 diabetes	3.65e-06	-0.117	0.703	34.4	0.155	0.890 (0.847 – 0.935)	0.000143	-0.105	0.592	28.78	0.188	0.901 (0.853 – 0.951)
	CHF	0.0256	-0.0765	0.518	33.36	0.307	0.926 (0.866 – 0.991)	0.334
	Essential hypertension	3.45155e-15	-0.0350689	0.00207391	41.6675	0.000252807	0.966 (0.957 – 0.974)	4.50048e-09	-0.028601	0.0574751	25.2787	0.00829748	0.972 (0.963 – 0.981)
	Facial aging	0.259
	Eye age	0.204
	Cirrhosis	0.41
	CKD	0.517
	Early onset COPD	0.173
	Gastrointestinal or abdominal disease	2.01842e-06	-0.0249834	0.867282	59.2397	1.40215e-06	0.975 (0.965 – 0.985)	9.58855e-08	-0.0292559	0.322023	43.9172	6.10435e-05	0.971 (0.961 – 0.982)
	Breast cancer	0.928
	Ovarian cancer	0.202
	Endometrial cancer	0.251
	Cervical cancer	8.66842e-38	-0.0219716	0.240159	14.0584	0.00711106	0.978 (0.975 – 0.982)	0.0602418
Detailed results would be listed when P value was significant.
*Result was obtained from WMM as the p value of IVW was not significant.
†Result was obtained from MER as the p value of IVW was not significant.
‡Result of heterogeneity test (MR Egger) was obtained according to the method of significant results.
MR	Mendelian randomization
SNP	single nucleotide polymorphisms
IVW	inverse variance weighted model
BMI	body mass index
WMM	weighted median model
MER	MR Egger regression model
LOAD	late-onset Alzheimer's disease
CHF	chronic heart failure
CKD	chronic kidney disease
COPD	chronic obstructive pulmonary disease
