# Supplementary material for: Early menarche and childbirth accelerate aging-related outcomes and age-related diseases: Evidence for antagonistic pleiotropy in humans
Source: eLife. 2025 Aug 12;13:RP102447. doi: 10.7554/eLife.102447 (PMC12342826; doi:10.7554/eLife.102447)
Supplement: Supplementary file 4. [file elife-102447-supp4.xlsx]

## Sheet: Supplementary File 4
Supplementary File 4. Overview results of two-step MR analysis with BMI as the mediator
Exposure	Outcome	P value (exposure to outcome)	Beta	P value (exposure to BMI)	Beta1	P value (BMI to outcome)	Beta2	ME	DE
Age at menarche	Frailty index	0.00575	-0.0236	2.73e-13	-0.0536	4.88672e-60	0.242336	-†	-†
	Type 2 diabetes	0.252*	-0.0209	2.73e-13	-0.0536	4.65126e-156	0.871813	-0.0467292	-
	CHF	0.028	-0.0483	2.73e-13	-0.0536	1.6731e-44	0.524796	-0.0281291	-0.0201709
Age at first birth	Frailty index	5.93e-11	-0.0649	6.85e-05	-0.0449	4.88672e-60	0.242336	-†	-†
	Type 2 diabetes	3.65e-06	-0.117	6.85e-05	-0.0449	4.65126e-156	0.871813	-0.0391444	-0.0778556
	CHF	0.0256	-0.0765	6.85e-05	-0.0449	1.6731e-44	0.524796	-0.0235634	-0.0529366
	Cervical cancer	8.66842e-38	-0.0219716	6.85e-05	-0.0449	0.0081773	0.0186653	-0.000838072	-0.0211336
*Result was not significant for IVW but significant for MER.
†Significant pleiotropy was detacted in the association between BMI and frailty index.
MR	Mendelian randomization
BMI	body mass index
ME	mediator effect
DE	direct effect
CHF	chronic heart failure
