# Supplementary material for: Early menarche and childbirth accelerate aging-related outcomes and age-related diseases: Evidence for antagonistic pleiotropy in humans
Source: eLife. 2025 Aug 12;13:RP102447. doi: 10.7554/eLife.102447 (PMC12342826; doi:10.7554/eLife.102447)
Supplement: Supplementary file 5. [file elife-102447-supp5.xlsx]

## Sheet: Supplementary File 5
Supplementary File 5. Results of two-sample MR analysis after colocalization
Exposure	Outcome	SNP	P value	Beta	Pleiotropy test	Heterogeneity test (IVW)		OR (95% CI)
						Cochran’s Q	P value
Age at menarche	Frailty index	rs112036939	0.0262*	-0.0284	0.55	252.47	4.1e-05	0.972 (0.948 – 0.997)
	Age at menopause onset	rs17053711	0.0273	0.111	0.851	273.05	8.88e-07	1.118 (1.013 – 1.234)
	Endometrial cancer	rs190286519	0.00917	-0.0898	0.09	182.81	0.272	0.957 (0.935 – 0.978)
Age at first birth	Frailty index	rs293566	0.000113	-0.0443	0.221	10.24	0.976	0.937 (0.919 – 0.961)
	Type 2 diabetes	rs6030812	0.000279	-0.091	0.652	19.61	0.607	0.913 (0.869 – 0.959)
*Result was obtained from WMM as the p value of IVW was not significant.
MR	Mendelian randomization
SNP	single nucleotide polymorphisms
IVW	inverse variance weighted model
WMM	weighted median model
