# Supplementary material for: Early menarche and childbirth accelerate aging-related outcomes and age-related diseases: Evidence for antagonistic pleiotropy in humans
Source: eLife. 2025 Aug 12;13:RP102447. doi: 10.7554/eLife.102447 (PMC12342826; doi:10.7554/eLife.102447)
Supplement: Supplementary file 6. [file elife-102447-supp6.xlsx]

## Sheet: Supplementary File 6
Supplementary File 6. The genetic correlation based on LDSC
Trait 1	Trait 2	𝑟𝑔	SE	Z-score	P value
Age at menarche	Age at first birth	0.1052	0.0195	5.3916	6.9826e-08
Age at menarche	BMI	-0.3154	0.0178	-17.7257	2.6568e-70
Age at menarche	Age at menopause onset	0.0777	0.0219	3.5497	0.0004
Age at first birth	BMI	-0.3927	0.0166	-23.6198	2.4131e-123
Age at first birth	Age at menopause onset	0.326	0.0298	10.9494	6.6869e-28
Age at menopause onset	BMI	-0.141	0.0188	-7.5141	5.7309e-14
BMI	body mass index
