# Supplementary material for: Early menarche and childbirth accelerate aging-related outcomes and age-related diseases: Evidence for antagonistic pleiotropy in humans
Source: eLife. 2025 Aug 12;13:RP102447. doi: 10.7554/eLife.102447 (PMC12342826; doi:10.7554/eLife.102447)
Supplement: Supplementary file 7. [file elife-102447-supp7.xlsx]

## Sheet: Supplementary File 7
Supplementary File 7. List of SNPs/genes from post-MR analysis showing an association between age at menarche onset and first birth with one or two aging outcomes
Exposure	Gene	SNP	Eur SNP Frequency	Global SNP Frequency	Genomic Region	Aging Outcomes
Age at first birth	PRKAG2	rs6964957	T=0.385292	T=0.393524	Intron Variant	Frailty index, Mother's death age
Age at first birth	SPAG16	rs73989464	G=0.18015	G=0.19430	Intron Variant	Menopause, Body mass index
Age at first birth	SYT14	rs7516843	G=0.34838	G=0.30275	Intron Variant	Essential hypertension
Age at first birth	DBNDD1	rs77576048	T=0.07908	T=0.06802	Intron Variant	Menopause, Gastrointestinal diseases
Age at first birth	NOL4L	rs293566	C=0.333621	C=0.370718	Intron Variant	Frailty index, Menopause
Age at first birth	SORCS3	rs12250380	G=0.51992	G=0.51992	Intron Variant	Frailty index, BMI
Age at first birth	ADARB1	rs394608	C=0.529562	C=0.521560	Intron Variant	Essential hypertension
Age at first birth	VAX1	rs6585429	G=0.823035	G=0.787581	Intron Variant	Body mass index
Age at menarche	ZFHX4	rs10090153	G=0.610849	G=0.589886	Intergenic variant	Body mass index
Age at menarche	MAPK3	rs57149692	C=0.40410	C=0.43346	Regulatory region variant	Father's death age, Facial aging
Age at menarche	C11orf58	rs117947332	C=0.04893	C=0.04341	Intron Variant	Father's death age, BMI
Age at menarche	EEFSEC	rs3849531	T=0.28151	T=0.35538	Intron Variant	Frailty index, BMI
Age at menarche	TRIM41	rs7727787	A=0.128488	A=0.121687	Intron Variant	Menopause, BMI
Age at menarche	UNC79	rs10150677	G=0.7127	G=0.6374	Intron Variant	Frailty index, Osteoporosis
Age at menarche	KBTBD2, RP9P	rs10226266	G=0.58533	G=0.61032	Intergenic variant	Mother's death age
Age at menarche	PTGR1	rs10817190	A=0.10628	A=0.11441	Intron Variant	Body mass index
Age at menarche	DPYD	rs11165924	G=0.322463	G=0.303930	Intron Variant	Facial aging
Age at menarche	TEX29, LINC02337	rs11619721	T=0.083769	T=0.079089	Intergenic variant	Menopause
Age at menarche	CYFIP2, FNDC9	rs11738611	A=0.15212	A=0.14823	CYFIP2 : Intron Variant FNDC9 : 2KB Upstream Variant	Menopause
Age at menarche	DLG2	rs11823251	G=0.27047	G=0.25146	Intron Variant	Father's death age, Body mass index
Age at menarche	RPS6KC1	rs12040029	T=0.132340	T=0.134256	Intron Variant	Body mass index
Age at menarche	OSBP2, LOC107985544	rs12167144	C=0.28475	C=0.32493	OSBP2 : Intron Variant LOC107985544 : Intron Variant	Type 2 diabetes
Age at menarche	LSP1, MIR7847	rs12360772	A=0.17675	A=0.18126	LSP1 : Intron Variant MIR7847 : 2KB Upstream Variant	Father's death age, Facial aging
Age at menarche	WSCD1, RNU6-1264P	rs12603280	A=0.23138	A=0.22333	Intergenic variant	Body mass index
Age at menarche	SLIT3, RNU6-477P	rs12656569	C=0.76882	C=0.77543	Intergenic variant	Chronic obstructive pulmonary disease
Age at menarche	ADCK1, FXNP1	rs12879819	T=0.3867	T=0.30897	Intergenic variant	Menopause
Age at menarche	TBCA	rs13185314	T=0.48227	T=0.49767	Regulatory region variant	Late onset Alzheimer's disease
Age at menarche	DET1	rs13835	A=0.431755	A=0.411742	Non Coding Transcript Variant	Gastrointestinal diseases
Age at menarche	GPD2	rs141651762	C=0.07893	C=0.06465	Intron Variant	Frailty index
Age at menarche	DLK1	rs1555406	T=0.120009	T=0.121329	3 Prime UTR Variant	Body mass index
Age at menarche	PTH2R	rs16841741	G=0.10954	G=0.12542	Intergenic variant	Mother's death age, Late onset Alzheimer's disease
Age at menarche	TRA2B	rs16860342	T=0.3130	T=0.27410	Intron Variant	Mother's death age, Breast cancer
Age at menarche	STXBP4	rs17817628	G=0.24723	G=0.23370	Intron Variant	Mother's death age
Age at menarche	CHD2	rs1881837	A=0.82909	A=0.81062	Intron Variant	Body mass index
Age at menarche	CADPS2	rs1899692	C=0.18459	C=0.19391	Intron Variant	Father's death age
Age at menarche	BEND6	rs34399458	T=0.16163	T=0.13653	Intron Variant	Body mass index
Age at menarche	MC3R	rs3746619	A=0.088077	A=0.108736	MC3R : 5 Prime UTR Variant	Osteoporosis
Age at menarche	INHBA, LINC01449	rs4141153	G=0.20104	G=0.200076	Intergenic variant	Breast cancer
Age at menarche	PRPF40A	rs4664605	T=0.636035	T=0.638262	Intron variant	Type 2 diabetes
Age at menarche	MAPK1	rs4821402	A=0.51008	A=0.55712	Intron Variant	Frailty index, Menopause
Age at menarche	IZUMO1R, GPR83	rs545075	C=0.9378	C=0.8506	Intergenic variant	Breast cancer
Age at menarche	PTPRN2	rs56283944	A=0.25609	A=0.23888	Intron Variant	Body mass index
Age at menarche	ENSAP3	rs60194422	A=0.45674	A=0.41874	Intergenic variant	Frailty index
Age at menarche	LEPR	rs61779781	C=0.34631	C=0.29659	Intron Variant	Body mass index
Age at menarche	CAMK4	rs62376854	G=0.03273	G=0.02600	Intron Variant	Chronic heart failure, Gastrointestinal diseases
Age at menarche	FAM120B	rs6456198	G=0.13573	G=0.12546	Intron Variant	Facial aging
Age at menarche	AFF3	rs6719214	C=0.15400	C=0.14396	Intron Variant	Frailty index, Mother's death age
Age at menarche	LRP1B	rs6747911	T=0.54475	T=0.52529	Intron Variant	Type 2 diabetes, Body mass index
Age at menarche	ATE1	rs7077302	G=0.92625	G=0.91116	Intron Variant	Father's death age
Age at menarche	C11orf63	rs7115813	G=0.55220	G=0.51741	JHY : 3 Prime UTR Variant	Essential hypertension
Age at menarche	IGF1R	rs72767997	C=0.02471	C=0.02163	Intron Variant	Body mass index
Age at menarche	KRT18P35	rs73205548	T=0.16786	T=0.14087	Intergenic variant	Essential hypertension
Age at menarche	CSMD1	rs7463166	G=0.35269	G=0.28322	Intron Variant	Facial aging, Breast cancer
Age at menarche	EFL1	rs77093843	A=0.20237	A=0.19026	Intron Variant	Late onset Alzheimer's disease
Age at menarche	USP10	rs774298	G=0.53112	G=0.45736	USP10 : Synonymous Variant	Facial aging
Age at menarche	WDR25	rs78352137	C=0.10243	C=0.08931	WDR25 : Intron Variant LOC124903383 : Non Coding Transcript Variant	Chronic obstructive pulmonary disease
Age at menarche	PTGR1	rs7852169	G=0.07507	G=0.11123	PTGR1 : Intron Variant ZNF483 : Intron Variant	Body mass index
Age at menarche	SPINDOC, ATP5MGP1	rs7949608	G=0.583292	G=0.567034	Intergenic variant	Menopause, Late onset Alzheimer's disease
Age at menarche	COG6	rs7986796	T=0.62026	T=0.63102	Intron Variant	Menopause, Endometrial cancer
Age at menarche	SREK1IP1	rs80170948	G=0.04273	G=0.037280	Missense Variant	Type 2 diabetes
Age at menarche	KDM4C	rs913588	A=0.486469	A=0.464902	Missense Variant	Frailty index
Age at menarche	SATB1	rs9310563	T=0.38346	T=0.37877	Intron Variant	Facial aging
Age at menarche	AP4M1	rs999885	A=0.51626	A=0.51415	Intron Variant	Mother's death age, Late onset Alzheimer's disease
Age at menarche	WSCD2	rs10861880	C=0.52821	C=0.48671	Intron Variant	Facial aging, Breast cancer
Age at menarche	CASC22	rs1362376	C=0.19508	C=0.17839	2KB Upstream Variant	Osteoporosis, Facial aging
Age at menarche	PRKD1	rs10136330	T=0.03612	T=0.06824	Intron Variant	Type 2 diabetes
Age at menarche	CCDC190	rs2343506	C=0.55437	C=0.59071	Intron Variant	Type 2 diabetes
Age at menarche	REXO1	rs35917007	G=0.51449	G=0.44314	2KB Upstream Variant	Frailty index
Age at menarche	SSBP3	rs643428	T=0.59176	T=0.60161	Intron Variant	Type 2 diabetes, Chronic obstructive pulmonary disease
Age at menarche	MTIF3	rs7992832	T=0.25591	T=0.24330	Intron Variant	Essential Essential hypertension, Facial aging
Age at menarche	SEC16B	rs509325	G=0.18429	G=0.19797	Intron Variant	Mother's death age, Chronic heart failure
Age at menarche	KDM4B	rs2251561	T=0.23459	T=0.23748	Intron Variant	Father's death age, Chronic obstructive pulmonary disease
Age at menarche	USP49	rs2254479	A=0.540383	A=0.547857	Intron Variant	Facial aging, Menopause
Age at menarche	TEX29, LINC02337	rs9560114	T=0.16066	T=0.12785	Intergenic variant	Menopause
Age at menarche	-	rs1058766	C=0.64577	C=0.68809	Synonymous Variant	Late onset Alzheimer's disease, Facial aging
Age at menarche	Y_RNA, PAX2	rs10786610	C=0.5744	C=0.5040	Intergenic variant	Menopause, BMI
Age at menarche	MEG9	rs7161194	G=0.64603	G=0.62660	intergenic variant	Frailty index, Type 2 diabetes
Age at menarche	LINC01977	rs7218751	G=0.179651	G=0.190309	2KB Upstream Variant	Menopause, Facial Aging
Age at menarche	LINC03051, LSAMP	rs7433864	A=0.46999	A=0.44492	Intron variant	Facial Aging, BMI
Age at menarche	MTCL1P1, LINC00348	rs803821	C=0.33473	C=0.31805	Intergenic variant	Frailty index, Type 2 diabetes
Age at menarche	LIN28AP1, CACYBPP2	rs842545	C=0.79968	C=0.751792	Intergenic variant	Frailty index, BMI
Age at menarche	LOC105375974	rs9406422	A=0.06412	A=0.12933	Intron Variant	Chronic heart failure, Facial Aging
Age at menarche	MIR3667HG, RPL35P8	rs9616551	G=0.79084	G=0.80605	Intergenic variant	Father's death age, Menopause
Age at menarche	VGLL3, LINC02070	rs9681954	C=0.60064	C=0.54979	Intergenic variant	Menopause, Chronic obstructive pulmonary disease
Age at menarche	NOL4	rs9945304	G=0.4769	G=0.4667	Intron Variant	Osteoporosis, Essential hypertension
Age at menarche	LINC03062	rs10908948	A=0.39813	A=0.40189	Intergenic variant	BMI
Age at menarche	UNC13C	rs11071027	C=0.54798	C=0.47965	Intron Variant	Osteoporosis
Age at menarche	NLRC3	rs12445430	T=0.208265	T=0.208359	Synonymous Variant	Osteoporosis
Age at menarche	ADI1P3, LINC02156	rs112335739	T=0.10619	T=0.09037	Intergenic variant	Menopause
Age at menarche	LOC105371116	rs114285994	A=0.06143	A=0.04744	Intron Variant	Menopause
Age at menarche	LOC105373703	rs142058842	G=0.16387	G=0.14246	Intron Variant	BMI
Age at menarche	PDE4D	rs256353	A=0.30211	A=0.38322	Intron Variant	Essential hypertension
Age at menarche	Y_RNA, MIR193BHG	rs1704528	C=0.35237	C=0.33790	Intergenic variant	Facial Aging
Age at menarche	LOC105377425	rs17464835	A=0.21140	A=0.17685	Intron Variant	Father's death age
Age at menarche	SMC4P1, THSD7B	rs17654195	A=0.239366	A=0.227426	Intergenic variant	Facial Aging
Age at menarche	C14orf39, SALRNA1	rs4365199	G=0.71084	G=0.66337	Intergenic variant	Facial Aging
Age at menarche	-	rs441675	G=0.48913	G=0.49349	Intergenic variant	Facial Aging
Age at menarche	THRB-AS1	rs1984870	T=0.47488	T=0.50760	Intergenic variant	Frailty index
Age at menarche	-	rs2066259	A=0.165266	A=0.186694	Intergenic variant	BMI
Age at menarche	MTND2P9, RPS19P6	rs2183004	A=0.28339	A=0.30024	Intergenic variant	Facial Aging
Age at menarche	RXRG	rs2194899	G=0.63379	G=0.56768	Intron variant	BMI
Age at menarche	KLF12	rs7329599	T=0.76219	T=0.72543	Intron Variant	Essential hypertension
Age at menarche	LOC107986606	rs7452200	T=0.49090	T=0.44690	Intron Variant	Frailty index
Age at menarche	CSMD1	rs4875259	C=0.5797	C=0.46405	Intron Variant	Osteoporosis
Age at menarche	OPRK1, NPBWR1	rs34726119	T=0.22221	T=0.22617	Intergenic variant	BMI
Age at menarche	KLHL3	rs56289631	A=0.23982	A=0.21699	Intron Variant	BMI
Age at menarche	MIR4508, MKRN3	rs6576457	A=0.30687	A=0.28186	Intergenic variant	Essential hypertension
Age at menarche	HNF1A-AS1	rs7135337	C=0.4605	C=0.4312	Intergenic variant	Father's death age
Age at menarche	-	rs67103685	C=0.25059	C=0.23379	Intergenic variant	Frailty index
Age at menarche	-	rs1755296	A=0.25300	A=0.25242	Intergenic variant	Facial Aging, BMI
Age at menarche	LOC105370465	rs17780982	T=0.61865	T=0.61519	Intron Variant	Facial Aging, BMI
Age at menarche	CENPW	rs1844594	A=0.46039	A=0.48425	Intron Variant	Menopause, Chronic obstructive pulmonary disease
Age at menarche	-	rs2539709	C=0.606998	C=0.616591	Intergenic variant	Facial Aging, BMI
Age at menarche	WWP1-AS1, SLC7A13	rs2953511	A=0.26795	A=0.26564	Intergenic variant	Late onset Alzheimer's disease, BMI
Age at menarche	-	rs4351477	G=0.07777	G=0.05934	Intergenic variant	Father's death age, BMI
		rs8087694
		rs8112411
		rs9321659
		rs9423024
		rs9554311
		rs9635759
		rs9991479
