# Supplementary material for: Early menarche and childbirth accelerate aging-related outcomes and age-related diseases: Evidence for antagonistic pleiotropy in humans
Source: eLife. 2025 Aug 12;13:RP102447. doi: 10.7554/eLife.102447 (PMC12342826; doi:10.7554/eLife.102447)
Supplement: Supplementary file 8. [file elife-102447-supp8.xlsx]

## Sheet: Supplementary File 8
Supplementary File 8. Ingenuity pathway analysis networks in age at menarche onset and first birth
Network ID	Score	DEGs/Focus molecules	Top diseases and functions
1	48	22	Cancer, Hematological Disease, Immunological Disease
2	35	17	Cardiovascular Disease, Organismal Injury and Abnormalities, Reproductive System Development and Function
3	27	14	Cancer, Cell-To-Cell Signaling and Interaction, Gastrointestinal Disease
4	25	13	Developmental Disorder, Neurological Disease, Organismal Injury and Abnormalities
5	25	13	Embryonic Development, Organismal Development, Tissue Development
6	22	12	Cancer, Developmental Disorder, Endocrine System Disorders
7	20	11	Cancer, Cellular Assembly and Organization, Organismal Injury and Abnormalities
8	16	9	Cell-To-Cell Signaling and Interaction, Post-Translational Modification, RNA Post-Transcriptional Modification
9	13	8	Carbohydrate Metabolism, Post-Translational Modification, Small Molecule Biochemistry
10	11	7	Amino Acid Metabolism, Post-Translational Modification, Small Molecule Biochemistry
11	2	1	Amino Acid Metabolism, Cardiovascular Disease, Organismal Injury and Abnormalities
12	2	1	Cancer, Dermatological Diseases and Conditions, Organismal Injury and Abnormalities
