# Supplementary material for: Early menarche and childbirth accelerate aging-related outcomes and age-related diseases: Evidence for antagonistic pleiotropy in humans
Source: eLife. 2025 Aug 12;13:RP102447. doi: 10.7554/eLife.102447 (PMC12342826; doi:10.7554/eLife.102447)
Supplement: Supplementary file 9. [file elife-102447-supp9.xlsx]

## Sheet: Supplementary File 9
Supplementary File 9. FDA-approved drugs against targets identified post-MR analysis
Gene	Drugs	Indication
PRKAG2	Metformin, bempedoic acid, Chromium nicotinate	Type 2 Diabetes, Refractory hypercholesterolemia, Dietary Supplement for Total parenteral nutrition (TPN)
SCN2A	Riluzole, Zonisamide, Tetracaine, Quinidine, Phenytoin, Topiramate	Amyotrophic lateral sclerosis, Partial seizures, Local anesthesia, Arrhythmia, Epilepsy, Migraine
DPYD	Oteracil	Chemotherapy agent
MC3R	Bremelanotide	Female sexual dysfunction
AKT	Capivasertib	Breast Cancer
MAPK	Dabrafenib, Vemurafenib	Non-small cell lung cancer/ thyroid cancer, Melanoma in patients who have the BRAF V600E mutation
KCNK9	General anesthetics e.g. Halothane	General anesthesia
TACR3	Fezolinetant	Vasomotor symptoms due to menopause
HTR4	Prucalopride, Metoclopramide, Cisapride	Chronic idiopathic constipation, Gastroesophageal reflux disease
RXRG	Acitretin/Alitretinoin/Bexarotene/Adapalene & Tretinoin	Psoriasis/Kaposi’s sarcoma and chronic hand eczema/T-cell lymphoma/Acne vulgaris
