# Supplementary material for: Early menarche and childbirth accelerate aging-related outcomes and age-related diseases: Evidence for antagonistic pleiotropy in humans
Source: eLife. 2025 Aug 12;13:RP102447. doi: 10.7554/eLife.102447 (PMC12342826; doi:10.7554/eLife.102447)
Supplement: Supplementary file 10. [file elife-102447-supp10.xlsx]

## Sheet: Supplementary File 10
Supplementary File 10. Participants included for population validation from UK Biobank
Exposure	Outcome	Number	Average/Morbidity	Categories
						Age group
Age at menarche			In total	<11y	11-12y	13-14y	15-16y	>16y
	All	264335	12.97	12351	90739	116635	40677	3933
	Death age	17572	70.79	69.67	70.72	70.84	71.18	70.95
	Death age ≥ 80	67247	0.76	0.698	0.75	0.78	0.77	0.7361
	Menopause age	129875	50.28	50.14	50.25	50.38	50.17	49.86
	Menopause age ≥50	129875	0.67	0.648	0.66	0.68	0.656	0.6277
	Diabetes	264335	0.0796	0.1221	0.0866	0.0699	0.0774	0.0974
	AD	264335	0.0078	0.0074	0.0078	0.0074	0.0088	0.0076
	High blood pressure	264335	0.2422	0.3124	0.2608	0.2265	0.2255	0.2316
	Heart failure	264335	0.0283	0.0377	0.0289	0.026	0.0296	0.0364
	Cerebral infarction	264335	0.015	0.0173	0.0151	0.0142	0.0162	0.0181
	COPD	264335	0.0395	0.051	0.0388	0.0353	0.0481	0.0582
	Breast cancer	264335	0.0693	0.076	0.0717	0.0684	0.0652	0.062
	Endometrial cancer	264335	0.0095	0.0124	0.011	0.0088	0.0074	0.0066
	BMI	263193	27.1	29.52	27.77	26.63	26.33	26.31
	BMI ≥30	263193	0.2373	0.396	0.2811	0.2044	0.1892	0.1986
						Age group
Age at first birth			In total	<21y	21-25y	26-30y	31-35y	>35y
	All	184481	25.31	28358	70778	61385	19541	4419
	Death age	12428	71.62	71.05	72.74	71.56	69.47	67.88
	Death age ≥ 80	51876	0.79	0.708	0.81	0.8	0.77	0.755
	Menopause age	93024	50.54	50.19	50.5	50.73	50.58	50.53
	Menopause age ≥50	93024	0.69	0.654	0.69	0.707	0.696	0.6894
	Diabetes	184481	0.0827	0.1301	0.093	0.0617	0.0494	0.0511
	AD	184481	0.0086	0.0109	0.0109	0.0065	0.0045	0.0032
	High blood pressure	184481	0.2514	0.315	0.2822	0.2186	0.1741	0.1478
	Heart failure	184481	0.0296	0.0482	0.0349	0.0209	0.0143	0.0125
	Cerebral infarction	184481	0.0158	0.0233	0.0183	0.0119	0.0101	0.0079
	Digestive system disease	184481	0.5314	0.6302	0.5683	0.4835	0.43	0.4209
	Cervical cancer	184481	0.0015	0.0024	0.0014	0.0013	0.0016	0.0007
	BMI	183727	27.17	28.71	27.55	26.52	25.94	25.65
	BMI ≥30	183727	0.2385	0.3419	0.26	0.1949	0.167	0.1537
						Number
Number of births			In total	0	1	2	3	4
	All	259758	2.77	48747	35265	115868	47198	12680
	Death age	17092	70.75	68.35	69.89	71.27	71.98	72.24
	Death age ≥ 80	65487	0.76	0.68	0.715	0.78	0.79	0.787
	Menopause age	127608	50.28	49.51	49.87	50.53	50.61	50.52
	Menopause age ≥50	127608	0.67	0.602	0.631	0.69	0.698	0.686
	Diabetes	259758	0.0777	0.0682	0.0805	0.071	0.0901	0.1221
	AD	259758	0.0077	0.0056	0.007	0.0075	0.0098	0.0118
	High blood pressure	259758	0.2406	0.2074	0.2415	0.242	0.2564	0.2932
	Heart failure	259758	0.0276	0.024	0.028	0.0255	0.0317	0.045
	Cerebral infarction	259758	0.0148	0.0124	0.0144	0.0141	0.0171	0.0225
	COPD	259758	0.0386	0.0261	0.0427	0.0353	0.0481	0.0695
	Digestive system disease	259758	0.5163	0.4636	0.5231	0.5192	0.5421	0.5781
	Breast cancer	259758	0.0696	0.0719	0.0721	0.0697	0.0662	0.0647
	Endometrial cancer	259758	0.0095	0.0125	0.0084	0.0089	0.009	0.0093
	Cervical cancer	259758	0.0016	0.0017	0.0022	0.0014	0.0013	0.0021
	BMI	258661	27.07	26.81	27.17	26.94	27.32	28.06
	BMI ≥30	258661	0.2347	0.2282	0.243	0.2219	0.2475	0.3053
AD	Alzheimer's disease
COPD	chronic obstructive pulmonary disease
BMI	body mass index
