# Supplementary material for: Early menarche and childbirth accelerate aging-related outcomes and age-related diseases: Evidence for antagonistic pleiotropy in humans
Source: eLife. 2025 Aug 12;13:RP102447. doi: 10.7554/eLife.102447 (PMC12342826; doi:10.7554/eLife.102447)
Supplement: Supplementary file 11. [file elife-102447-supp11.xlsx]

## Sheet: Supplementary File 11
Supplementary File 11. Estimate effect compared to youngest/smallest group for outcomes in regression analysis II
Exposure	Outcome			Category			R2McF/R2CU
				Age group
		<11y	11-12y	13-14y	15-16y	>16y
Age at menarche	Death age		1.000***	1.132***	1.159***	0.888	0.045/0.044‡
	Death age ≥ 80		0.219***	0.345***	0.289***	0.091	0.014/0.023
	Menopause age		0.121	0.269***	0.093	-0.193	0.004/0.004‡
	Menopause age ≥50		0.077*	0.136***	0.052	-0.06	0.003/0.005
	Diabetes		-0.178***	-0.258***	-0.163***	0.045	0.105/0.133
	High blood pressure		-0.122***	-0.209***	-0.232***	-0.201***	0.056/0.090
	Heart failure		-0.155**	-0.180***	-0.11	0.069	0.047/0.053
	COPD		-0.242***	-0.318***	-0.096	0.118	0.090/0.104
	Breast cancer		-0.056	-0.097**	-0.148***	-0.184*	0.001/0.002
	Endometrial cancer		0.004	-0.123	-0.301**	-0.444*	0.021/0.022
	BMI†		-1.746***	-2.885***	-3.310***	-3.390***	0.042/0.042‡
	BMI ≥30†		-0.520***	-0.945***	-1.088***	-1.052***	0.024/0.038
				Age group
		<21y	21-25y	26-30y	31-35y	>35y
Age at first live birth	Death age		1.915***	1.028***	-0.678*	-1.602**	0.050/0.050‡
	Death age ≥ 80		0.511***	0.456***	0.306***	0.235*	0.017/0.028
	Menopause age		0.244***	0.400***	0.241***	0.207	0.005/0.005‡
	Menopause age ≥50		0.106***	0.169***	0.109***	0.086	0.003/0.006
	Diabetes		-0.178***	-0.383***	-0.491***	-0.384***	0.107/0.136
	AD		0.125	-0.206*	-0.494***	-0.747**	0.025/0.026
	High blood pressure		-0.015	-0.189***	-0.380***	-0.532***	0.056/0.091
	Heart failure		-0.136***	-0.430***	-0.693***	-0.807***	0.051/0.058
	Cerebral infarction		-0.139**	-0.414***	-0.509***	-0.724***	0.019/0.021
	Digestive system disease		-0.157***	-0.383***	-0.544***	-0.563***	0.026/0.047
	Cervical cancer		-0.516**	-0.532**	-0.296	-1.139	0.005/0.005
	BMI†		-1.028***	-1.831***	-2.289***	-2.541***	0.041/0.041‡
	BMI ≥30†		-0.349***	-0.647***	-0.792***	-0.877***	0.022/0.035
				Number
Number of births		0	1	2	3	4
	Death age		0.971***	2.381***	2.953***	2.930***	0.063/0.063‡
	Death age ≥ 80		0.185***	0.519***	0.598***	0.579***	0.021/0.033
	Menopause age		0.402***	1.041***	1.133***	1.074***	0.013/0.013‡
	Menopause age ≥50		0.144***	0.392***	0.446***	0.403***	0.007/0.012
	Diabetes		0.086**	-0.028	0.157***	0.336***	0.103/0.130
	AD		0.095	0.150*	0.382**	0.517***	0.025/0.026
	High blood pressure		0.112***	0.126***	0.156***	0.242***	0.056/0.090
	Heart failure		0.042	-0.039	0.117**	0.364***	0.047/0.053
	Cerebral infarction		0.065	0.044	0.196***	0.385***	0.017/0.018
	Digestive system disease		0.170***	0.165***	0.228***	0.315***	0.021/0.039
	Breast cancer		-0.019	-0.050*	-0.107***	-0.140***	0.001/0.002
	Endometrial cancer		-0.448***	-0.368***	-0.404***	-0.431***	0.023/0.024
	BMI†		0.197***	-0.042	0.291***	0.928***	0.018/0.018‡
	BMI ≥30†		0.027	-0.095***	0.031*	0.283***	0.011/0.017
The coefficients (β) in logistic regression were log-odds ratios.
† Results of regression analysis I were showed.
‡ Multiple R2/Adjusted R2 for death age, menopause age, and BMI.
P<0.001, ***; p<0.01, **; p<0.05, *.
COPD	chronic obstructive pulmonary disease
AD	Alzheimer's disease
BMI	body mass index
