# Supplementary material for: Early menarche and childbirth accelerate aging-related outcomes and age-related diseases: Evidence for antagonistic pleiotropy in humans
Source: eLife. 2025 Aug 12;13:RP102447. doi: 10.7554/eLife.102447 (PMC12342826; doi:10.7554/eLife.102447)
Supplement: Supplementary file 12. [file elife-102447-supp12.xlsx]

## Sheet: Supplementary File 12
Supplementary File 12. Estimate effect of combined age at menarche and first live birth and sample distribution
Outcome			Age group
		<21y	21-25y	26-30y	31-35y	>35y
	<11y	1508	3130	2588	746	149
	11-12y	9668	23633	19987	6196	1385
Number of people	13-14y	11510	29897	27570	9026	2023
	15-16y	4647	11377	8932	2705	642
	>16y	326	1081	781	256	58
		<21y	21-25y	26-30y	31-35y	>35y
	<11y	0.631780***	0.406694***	0.281117***	0.072735	0.249457
	11-12y	0.407460***	0.245339***	0.043630	0.022259	0.091699
Diabetes	13-14y	0.363844***	0.192601***		-0.154909*	0.018743
	15-16y	0.490880***	0.326578***	0.022471	-0.058556	-0.077217
	>16y	0.575933***	0.607008***	0.337511*	0.187702	0.621318
		<21y	21-25y	26-30y	31-35y	>35y
	<11y	0.361760***	0.317106***	0.256376***	0.088593	0.112096
	11-12y	0.277661***	0.251566***	0.088165***	-0.098848**	-0.208664**
High blood pressure	13-14y	0.197322***	0.205030***		-0.204518***	-0.379235***
	15-16y	0.182313***	0.134637***	-0.007545	-0.185962***	-0.402811**
	>16y	0.249520*	0.326483***	0.041232	0.018960	-0.399804
		<21y	21-25y	26-30y	31-35y	>35y
	<11y	0.574195***	0.424207***	0.160949	-0.162606	0.034310
	11-12y	0.458214***	0.280972***	-0.102607	-0.074485	-0.320604
Heart failure	13-14y	0.427791***	0.284801***		-0.386709***	-0.528296*
	15-16y	0.454204***	0.379917***	0.174229*	-0.317796	-0.559464
	>16y	0.756168**	0.581503***	0.506091*	0.234194	0.812131
		<21y	21-25y	26-30y	31-35y	>35y
	<11y	1.4855490***	1.1855350***	0.9265615***	0.9661005***	0.7509192***
	11-12y	1.0143211***	0.7050248***	0.4548535***	0.3269974***	0.3101029***
BMI ≥30	13-14y	0.6995374***	0.3110211***		-0.1491117***	-0.1728500*
	15-16y	0.5435601***	0.2343927***	-0.1348561***	-0.3757718***	-0.7062295***
	>16y	0.6893215***	0.2787547***	-0.0322042	-0.4881873*	-0.9370264
The coefficients (β) in logistic regression were log-odds ratios.
P<0.001, ***; p<0.01, **; p<0.05, *.
BMI	body mass index
